# Supplementary material
Source: PubMed Central journal article supplement (PMC5079420)
Supplement: Supp_Figure1.pdf [file Supp_Figure1.pdf]

## Supplementary Data

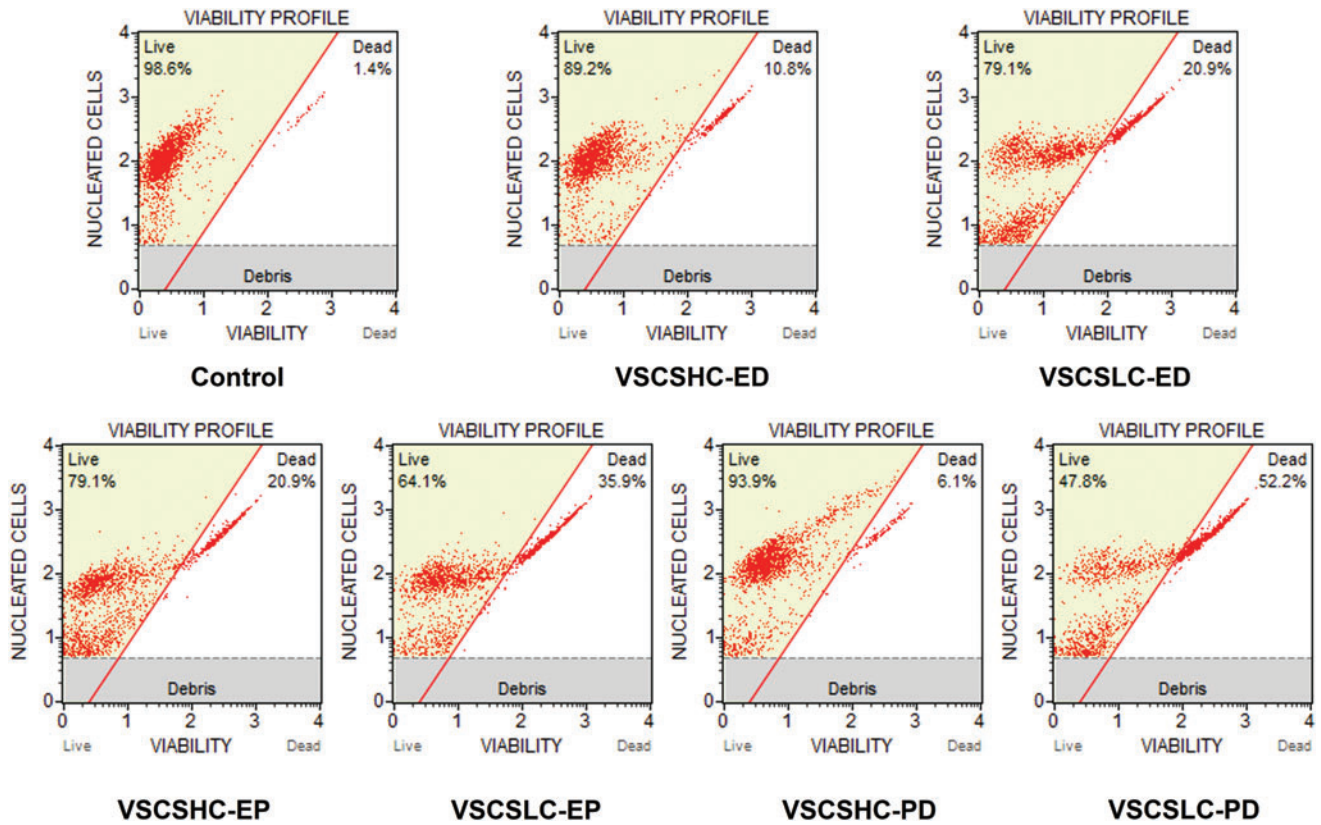

**SUPPLEMENTARY FIG. S1.** Typical figures from Muse™ Cell Analyzer used for obtaining the quantitative data of cell viability shown in Figure 3B.
