# Supplementary material
Source: PubMed Central journal article supplement (PMC5079420)
Supplement: Supp_Figure2.pdf [file Supp_Figure2.pdf]

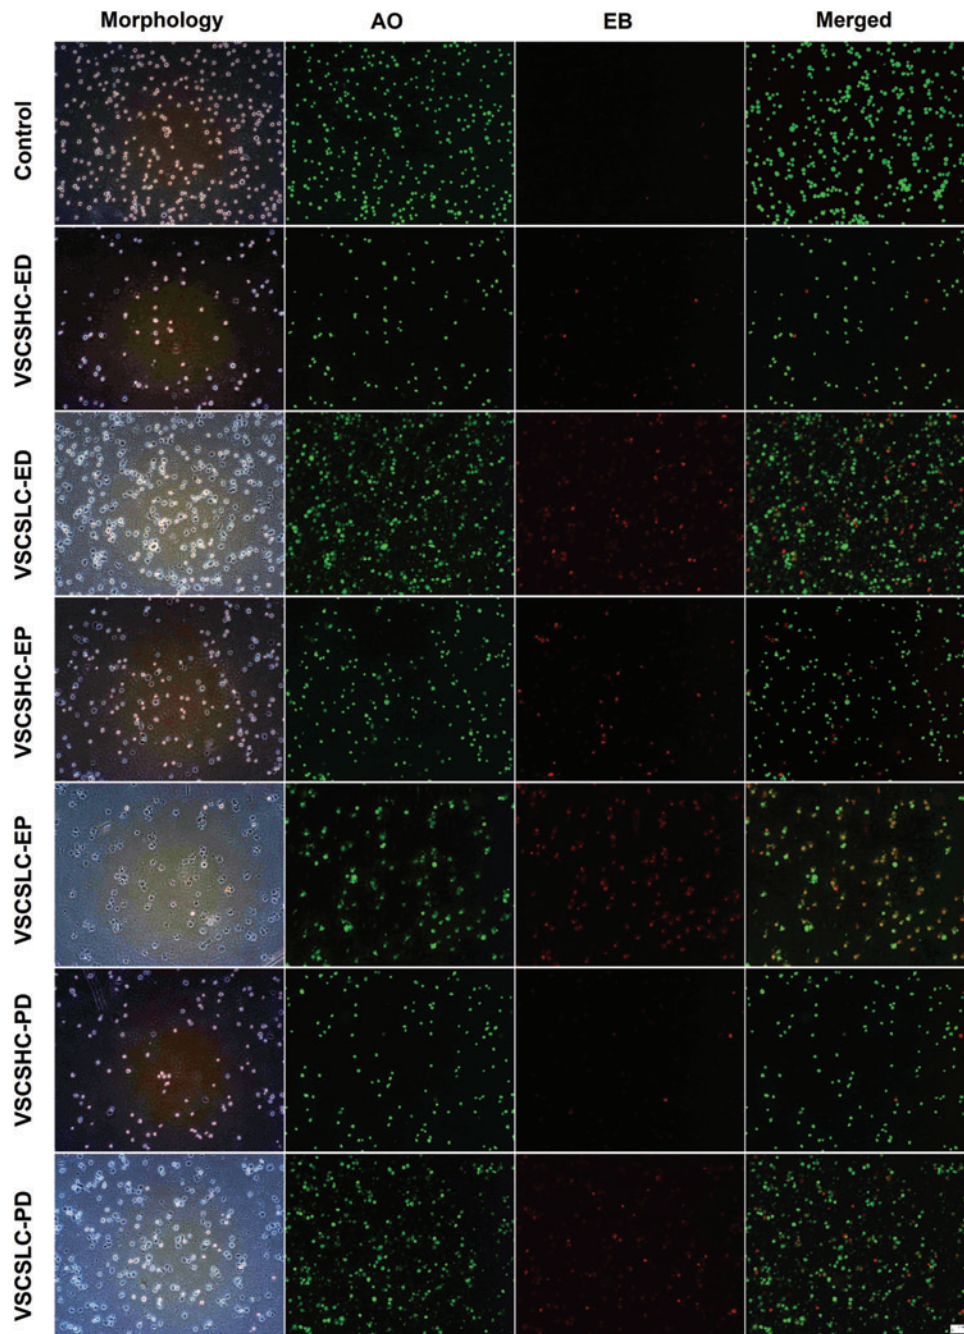

**SUPPLEMENTARY FIG. S2.** Typical phase and fluorescence micrographs (before and after merging the *red* and *green* channels) corresponding to that shown in Figure 3C.
