# Supplementary material
Source: PubMed Central journal article supplement (PMC5079420)
Supplement: Supp_Figure3.pdf [file Supp_Figure3.pdf]

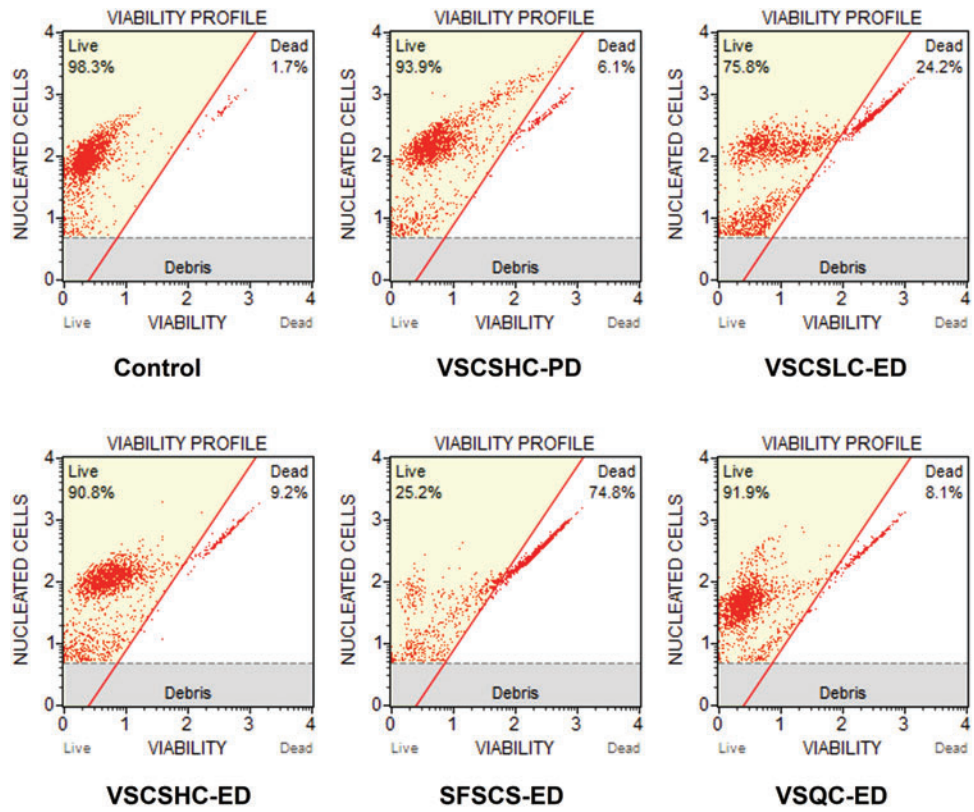

**SUPPLEMENTARY FIG. S3.** Typical figures obtained from Muse Cell Analyzer used for obtaining the quantitative data of cell viability shown in Figure 4B.
