# Supplementary material
Source: PubMed Central journal article supplement (PMC5079420)
Supplement: Supp_Figure4.pdf [file Supp_Figure4.pdf]

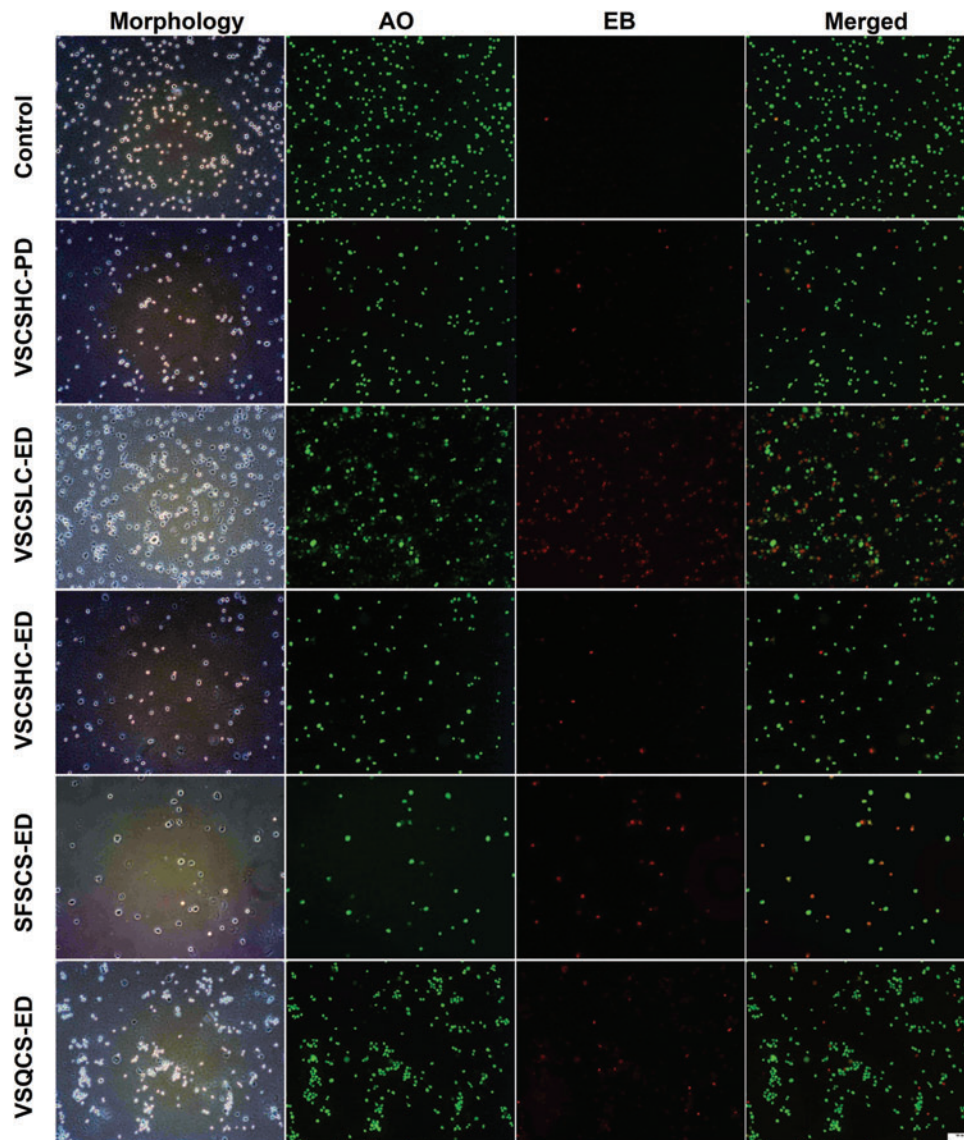

**SUPPLEMENTARY FIG. S4.** Typical phase and fluorescence micrographs (before and after merging the *red* and *green* channels) corresponding to that shown in Figure 4C.
